# Supplementary material
Source: HighWire-hosted journal article supplement (https://erj.ersjournals.com/content/55/2/1901208)
Supplement: inline-supplementary-material-1 [file inline-supplementary-material-1.pdf]

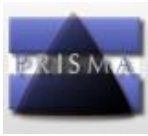

## PRISMA 2009 Flow Diagram

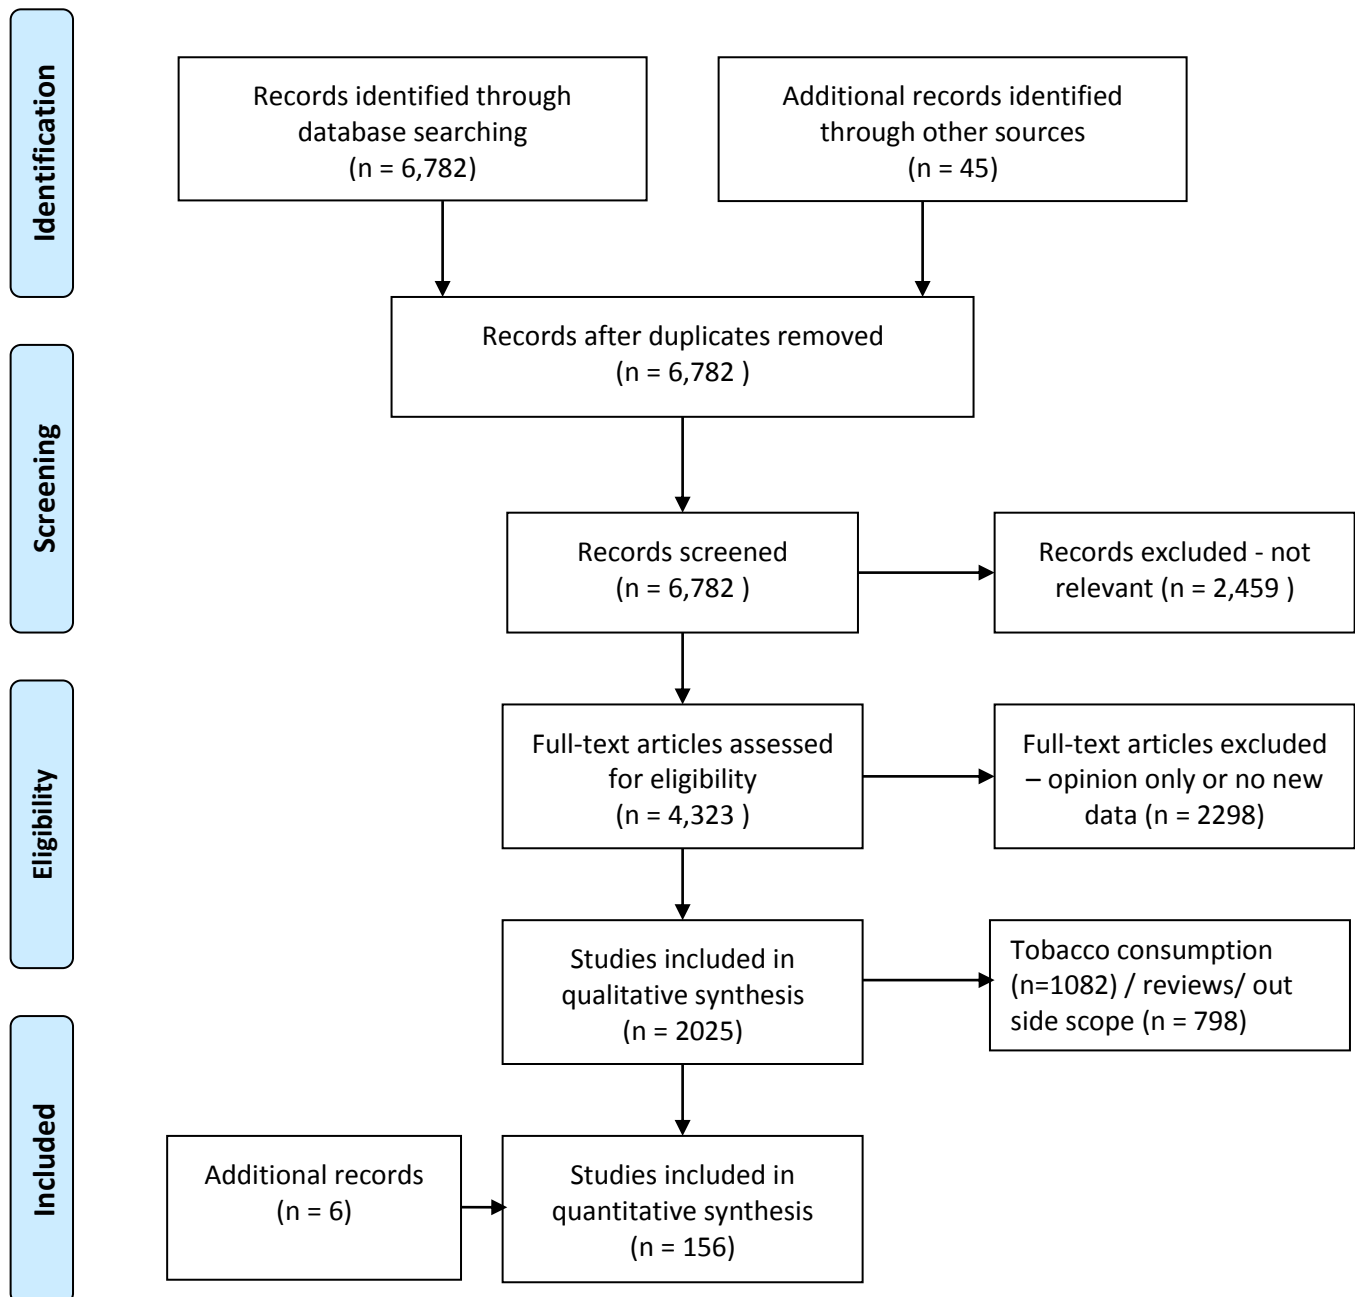

From: Moher D, Liberati A, Tetzlaff J, Altman DG, The PRISMA Group (2009). Preferred Reporting Items for Systematic Reviews and Meta-Analyses: The PRISMA Statement. PLoS Med 6(7): e1000097. doi:10.1371/journal.pmed1000097

For more information, visit [www.prisma-statement.org](http://www.prisma-statement.org).

CINAHL November 12, 2017

| #   | Query                                                                                                                                                                                                                                                                   | Results |
|-----|-------------------------------------------------------------------------------------------------------------------------------------------------------------------------------------------------------------------------------------------------------------------------|---------|
| S12 | S3 AND S8 AND S11                                                                                                                                                                                                                                                       | 50      |
| S11 | S9 OR S10                                                                                                                                                                                                                                                               | 194,121 |
| S10 | ( (pregnan* or antenatal or prenatal or perinatal or peripartal pr peripartum or natal or gravidit* or gravida* or multigravid* or primigravid*) ) OR ( (expectant N0 (mother* or wom#n or female*)) )                                                                  | 188,273 |
| S9  | (MH "Pregnancy+")                                                                                                                                                                                                                                                       | 152,525 |
| S8  | S4 OR S5 OR S6 OR S7                                                                                                                                                                                                                                                    | 221,560 |
| S7  | ( (exercise N2 (therap* or training)) ) OR ( (physical* N2 (endurance or exertion* or fitness or therap* or program* or training)) ) OR ( (physiotherap* or kinesiotherap*) )                                                                                           | 98,578  |
| S6  | (MH "Physical Fitness+") OR (MH "Physical Endurance+") OR (MH "Exertion+") OR (MH "Physical Education and Training+")                                                                                                                                                   | 81,075  |
| S5  | (MH "Physical Therapy+") OR (MH "Chest Physical Therapy+") OR (MH "Physical Therapy Practice") OR (MH "Physical Therapy Practice, Research-Based") OR (MH "Physical Therapy Practice, Evidence-Based") OR (MH "Physical Therapy Service") OR (MH "Physical Therapists") | 114,899 |
| S4  | (MH "Exercise+") OR (MH "Therapeutic Exercise+") OR (MH "Respiratory Therapy") OR (MH "Respiratory Therapy Service")                                                                                                                                                    | 101,374 |
| S3  | S1 OR S2                                                                                                                                                                                                                                                                | 42,103  |
| S2  | ( (cystic fibros* or asthma* or bronchiectas*) ) OR ( (primary ciliary dyskines* or kartagener) )                                                                                                                                                                       | 42,032  |
| S1  | (MH "Cystic Fibrosis") OR (MH "Asthma+") OR (MH "Bronchiectasis") OR (MH "Ciliary Motility Disorders")                                                                                                                                                                  | 33,551  |
