# Supplementary material
Source: HighWire-hosted journal article supplement (https://erj.ersjournals.com/content/55/2/1901208)
Supplement: inline-supplementary-material-2 [file inline-supplementary-material-2.pdf]

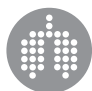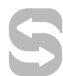

SHAREABLE PDF

# ERS/TSANZ Task Force Statement on the management of reproduction and pregnancy in women with airways diseases

Peter G. Middleton <sup>1</sup>, Elisabeth J. Gade<sup>2</sup>, Cristina Aguilera<sup>3</sup>, Lucy MacKillop<sup>4</sup>, Brenda M. Button<sup>5</sup>, Courtney Coleman<sup>6</sup>, Barbara Johnson<sup>6</sup>, Charlotte Albrechtsen<sup>7</sup>, Frank Edenborough<sup>8</sup>, David Rigau<sup>9</sup>, Peter G. Gibson <sup>10</sup> and Vibeke Backer <sup>11</sup>

**Affiliations:** <sup>1</sup>CF Research Group, Ludwig Engel Centre for Respiratory Research, Westmead Institute for Medical Research, University of Sydney, Sydney, Australia. <sup>2</sup>Dept of Gynecology and Obstetrics, Rigshospitalet, Copenhagen, Denmark. <sup>3</sup>Dept of Clinical Pharmacology, University Hospital Vall d'Hebron, Barcelona, Spain. <sup>4</sup>Oxford University Hospitals NHS Foundation Trust, Nuffield Dept of Women's and Reproductive Health, University of Oxford, Oxford, UK. <sup>5</sup>Dept of Medicine, Nursing and Health Sciences, Monash Institute of Medical Research, Monash University, Melbourne Australia. <sup>6</sup>European Lung Foundation, Sheffield, UK. <sup>7</sup>Dept of Anaesthetics, Rigshospitalet, Copenhagen, Denmark. <sup>8</sup>Sheffield Adult Cystic Fibrosis Centre, Northern General Hospital, Sheffield, UK. <sup>9</sup>Iberoamerican Cochrane Centre, Barcelona, Spain. <sup>10</sup>Centre for Asthma and Respiratory Diseases, Faculty of Health and Medicine, University of Newcastle, Newcastle, Australia. <sup>11</sup>Centre for Physical Activity Research, Rigshospitalet and Copenhagen University, Copenhagen, Denmark.

**Correspondence:** Peter G. Middleton, Westmead Hospital, Ludwig Engel Centre for Respiratory Research, Hawkesbury Road, Westmead, Sydney, NSW 2145, Australia. E-mail: peter.middleton@sydney.edu.au

@ERSpublications

**Good management of women with airways diseases before, during and after pregnancy is an important area of respiratory medicine, affecting both the mother and child: a statement from the ERS and TSANZ** <http://bit.ly/2mMwvGZ>

**Cite this article as:** Middleton PG, Gade EJ, Aguilera C, *et al.* ERS/TSANZ Task Force Statement on the management of reproduction and pregnancy in women with airways diseases. *Eur Respir J* 2020; 55: 1901208 [<https://doi.org/10.1183/13993003.01208-2019>].

This single-page version can be shared freely online.

**ABSTRACT** This European Respiratory Society/Thoracic Society of Australia and New Zealand statement outlines a review of the literature and expert opinion concerning the management of reproduction and pregnancy in women with airways diseases: asthma, cystic fibrosis (CF) and non-CF bronchiectasis. Many women with these diseases are now living into reproductive age, with some developing moderate-to-severe impairment of lung function in early adulthood. The statement covers aspects of fertility, management during pregnancy, effects of drugs, issues during delivery and the post-partum period, and patients' views about family planning, pregnancy and parenthood. The statement summarises current knowledge and proposes topics for future research, but does not make specific clinical recommendations.
